# Supplementary material for: Fabrication of Novel Polymer Composites from Leather Waste Fibers and Recycled Poly(Ethylene-Vinyl-Acetate) for Value-Added Products
Source: MDPI journal article supplement (doi:10.3390/su15054333), 2023-02-28
Supplement: s1 [file s1]

Archive with 1 entries (1 files):
- sustainability-2135688-supplementary.pdf
