# Supplementary material for: Fabrication of Novel Polymer Composites from Leather Waste Fibers and Recycled Poly(Ethylene-Vinyl-Acetate) for Value-Added Products
Source: MDPI journal article supplement (doi:10.3390/su15054333), 2023-02-28
Supplement: s1 [file s1 › sustainability-2135688-supplementary.pdf]

## ANNEXURE

### LIST OF SUPPLEMENTARY FIGURES AND TABLES

#### LIST OF SUPPLEMENTARY FIGURES:

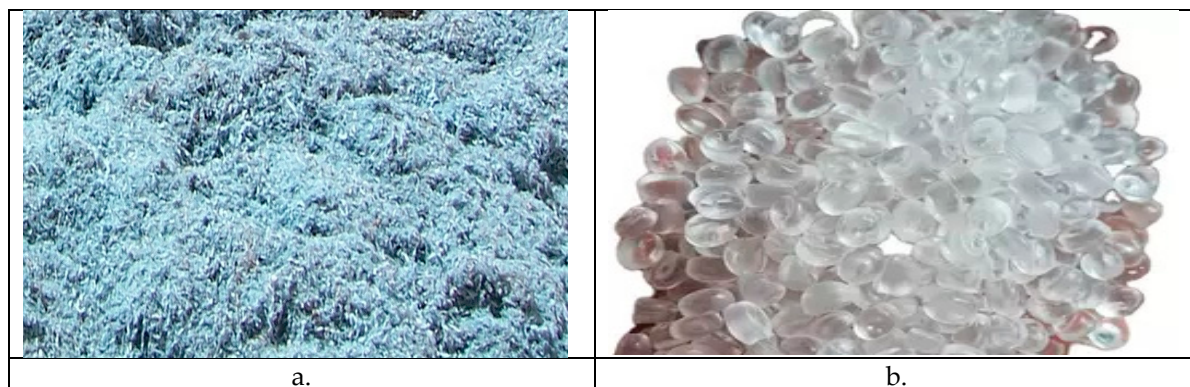

Figure S1. (a). Leather-shavings employed as reinforcing-particulates, and S1(b). Recycled EVA granules [Adapted from the reference 135]

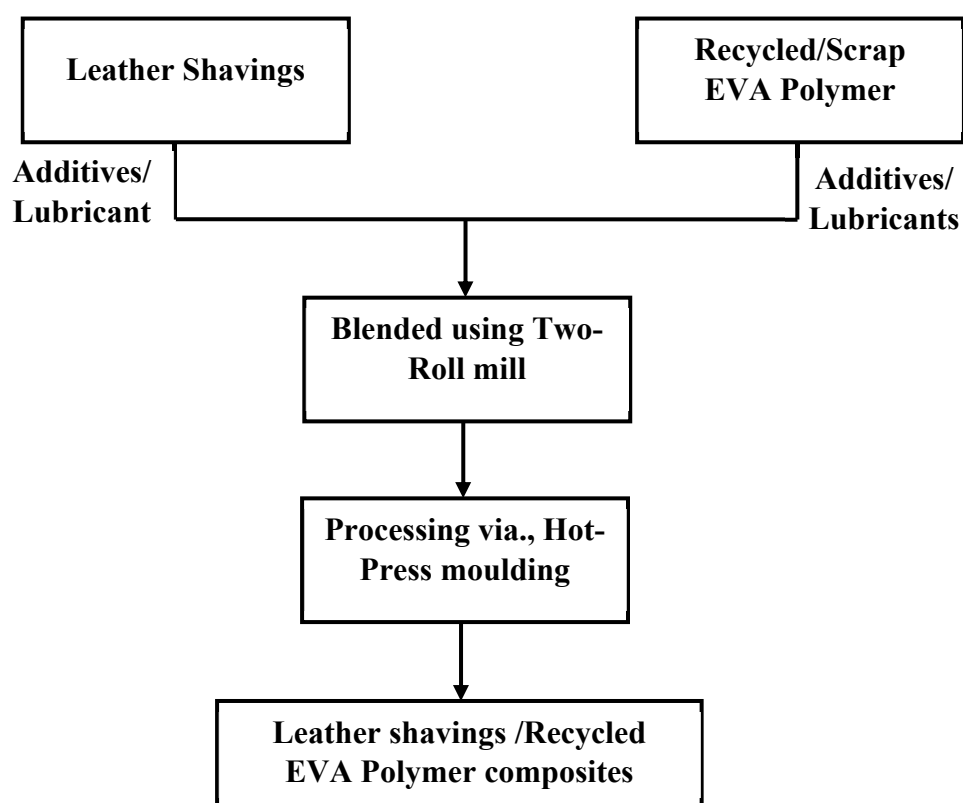

Figure S2. Process flow diagram for recycling thermoplastic elastomer and polymer composites from solid leather wastes.

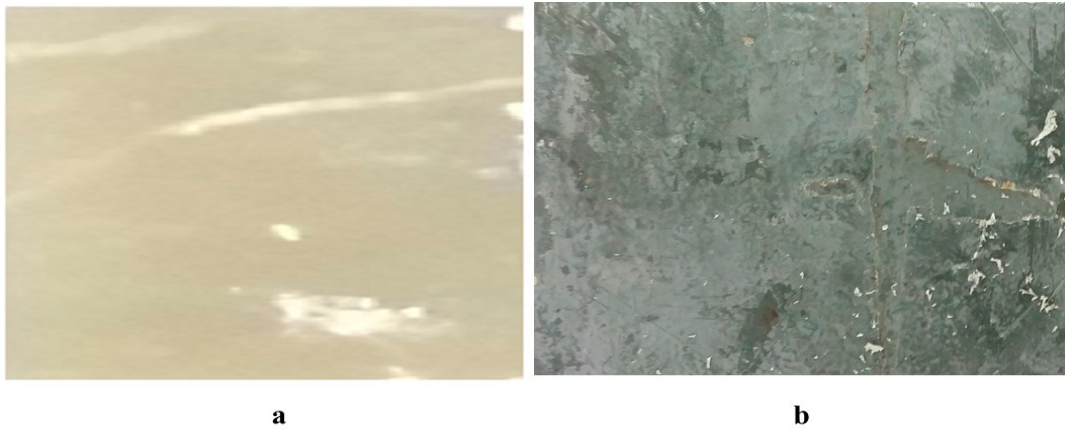

Figure S3. (a). “Neat recycled-EVA polymeric-composites [Adapted from the reference 135]”, and S3(b). “Leather-shavings/recycled EVA-polymeric composites”.

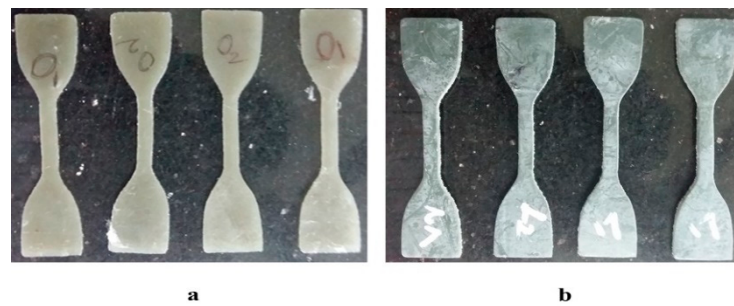

Figure S4. “Dumb-bell shaped’ Tensile Test Sample [Adapted from the reference 135]

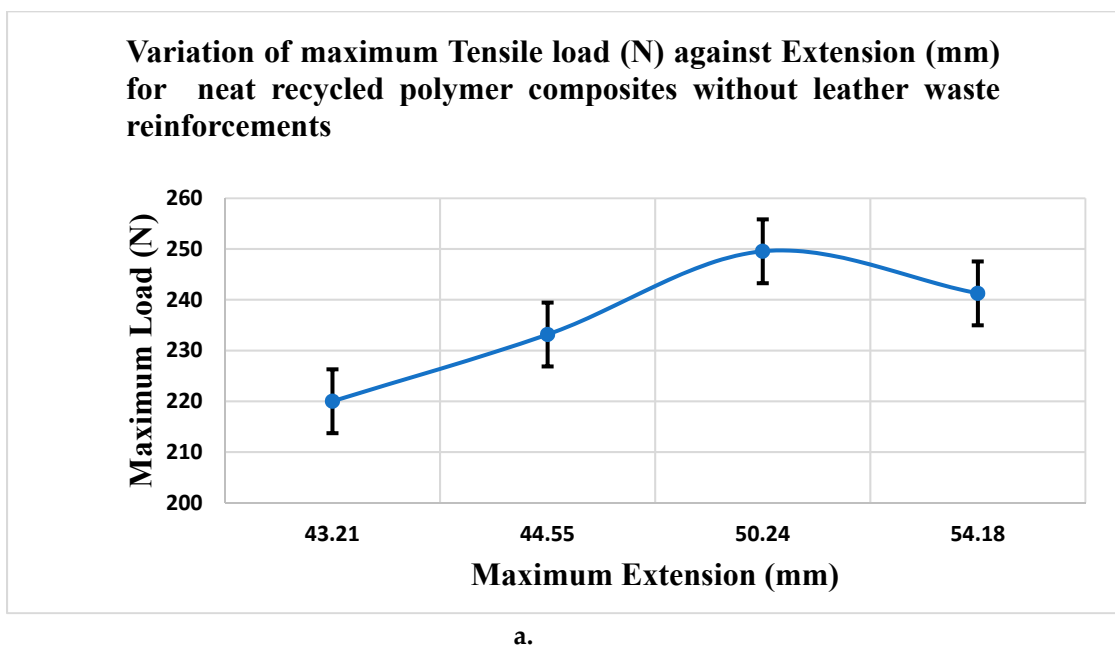

**Variation of maximum Tensile load (N) against Extension (mm) for Specimen-L, Leather Shavings/Recycled EVA Polymer composites**

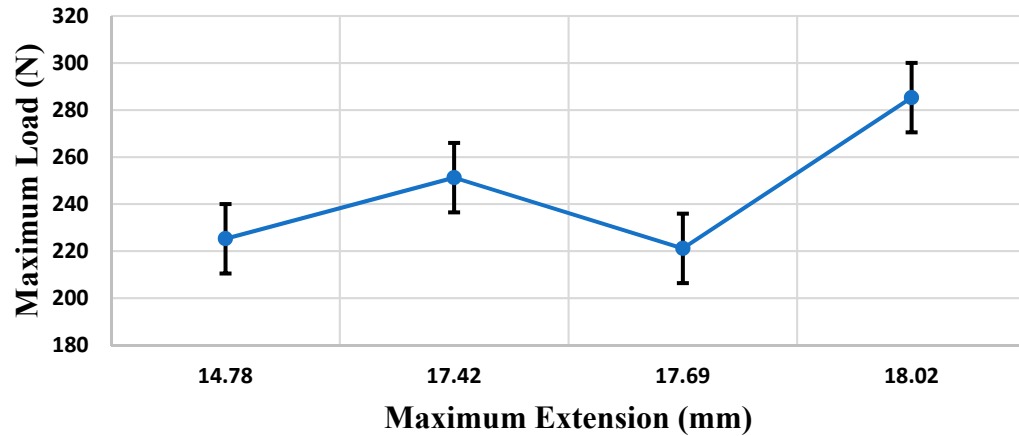

b.

Figure S5. (a-b). "Variation of tensile load (N) against extension (mm) of recycled EVA polymer composites with or without leather shavings"

**Compressive strength of pure and recycled polymer composites with or without leather waste reinforcements**

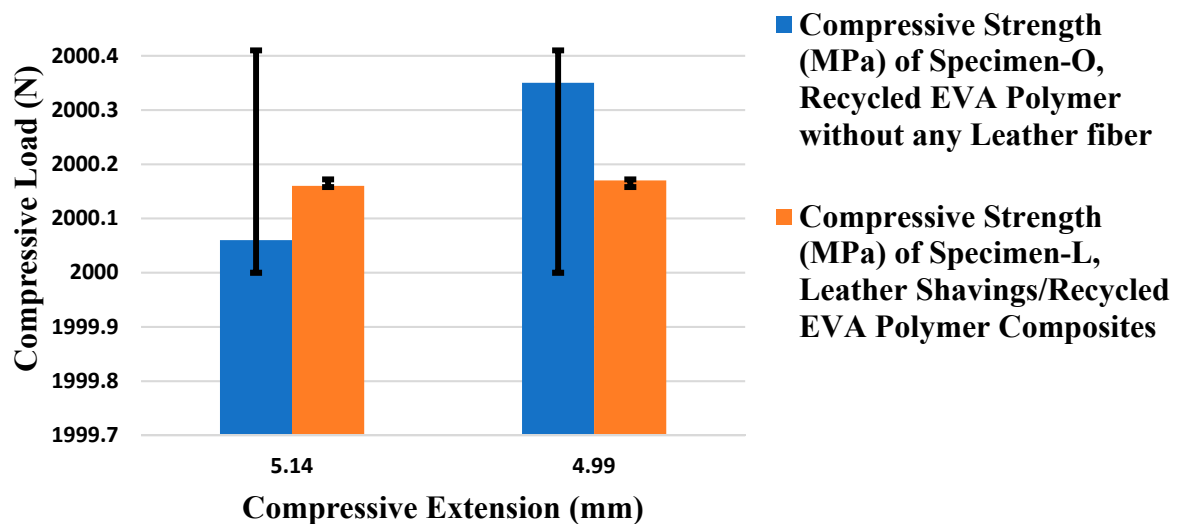

Figure S6. Comparison of "Compressive strength (MPa)" for "neat-recycled EVA", and "recycled-EVA polymer composites"

# LIST OF SUPPLEMENTARY TABLES:

Table S1. Compositions of polymer composite samples in wt.-ratios

| Samples                                                  | Weight ratios                  |                                                   |                                                                                 | Additives and Lubricants                                                                                                                              |
|----------------------------------------------------------|--------------------------------|---------------------------------------------------|---------------------------------------------------------------------------------|-------------------------------------------------------------------------------------------------------------------------------------------------------|
|                                                          | Recycled EVA polymers (Matrix) | Leather Shaving fibers (Reinforcing-constituents) | Recycled EVA polymers: Leather Shaving fiber composites (formulation in ratios) |                                                                                                                                                       |
| "Neat recyclable EVA material, free from leather fibers" | 1                              | 0                                                 | 1:0                                                                             | Zinc octadecanoate and Octadecanoic acid (Additives, two-percent by wt.)<br><br>Paraffins, and Naphthalene oils (Lubricants/Oils, two-percent by wt.) |
| "Leather Shaving fibers/Recycled EVA polymer composites" | 1                              | 1                                                 | 1:1                                                                             |                                                                                                                                                       |

Table S2. Standard test methods, equipment details with model/machine numbers, and standards were followed in this investigation.

| S.No. | Name of Experiments                                                                                             | "ASTM/ISO/SATRA TM Standards followed"                      |
|-------|-----------------------------------------------------------------------------------------------------------------|-------------------------------------------------------------|
| 1     | "Tensile Strength of Polymer using INSTRON equipment, model 3369J7257, with an optical extensometer"            | "SATRA TM-137 1995"                                         |
| 2     | "Compressive Strength of Polymer using INSTRON equipment, model 3369J7257, with an optical extensometer"        | "ASTM D-3410"                                               |
| 3     | "Tear Strength and Extension of Polymer using INSTRON equipment, model 3369J7257, with an optical extensometer" | "SATRA TM-218 1999/ISO 20344:2011"                          |
| 4     | "Adhesion Strength of Polymer"                                                                                  | "SATRA TM-401 2000"                                         |
| 5     | "Compression set-constant relaxation method (CRT) stress"                                                       | "SATRA TM-64 1996"                                          |
| 6     | "Abrasion resistance using Rotating Drum method, model STM-140, UK"                                             | "ISO 20871:2001/TM-174:2016/ISO-20344 (8.3)/ISO 4649:20871" |
| 7     | "Density of Polymers by Displacement Volume"                                                                    | ASTRA TM-134:2010/ ASTM-D-792-00"                           |

|    |                                                                                                                                              |                                         |
|----|----------------------------------------------------------------------------------------------------------------------------------------------|-----------------------------------------|
| 8  | "Hardness of Rubber and Durometer method Plastics"                                                                                           | "SATRA TM-205:2016/ISO 868:2013"        |
| 9  | "Moisture content (%)"                                                                                                                       | "SATRA TM347:1996 and EN ISO 4684:2005" |
| 10 | "Detection of Chromium content using UV-Visible spectrophotometry"                                                                           | "IUC 8 & 18 test standards"             |
| 11 | "Thermogravimetric Analysis (TGA) TA Instruments, model Q-50"                                                                                | "Powder form (1-5 gm)"                  |
| 12 | "Differential Scanning Calorimetry (DSC) TA Instruments, model Q-200"                                                                        | "Powder form (1-5 gm)"                  |
| 13 | "Fourier-transform infrared spectroscopy- Attenuated total reflection (FTIR-ATR) using JASCO, FTIR-model 4700"                               | "Powder/Pellets form (1-5 gm)"          |
| 14 | "Scanning Electron Microscopy (SEM Analysis) using Phenom world Proat an accelerating voltage of 10 kV"                                      | "Powder form upto 32 mm (Ø)"            |
| 15 | "Elemental Composition analysis using Thermo Fisher Scientific model Quanta200"                                                              | "Powder form (2-7 gm)"                  |
| 16 | "Phase identification and Structural analysis using wide-angle X-ray diffractometer (XRD), make with model name (Bruker AXS, ECO D8 Advance" | "Powder form (2-4 gm)"                  |
| 17 | "Atomic force Microscopy (AFM Analysis) using NT-MDT, Ireland model no. NTEGRA PRIMA"                                                        | "Measuring mode in air and liquid"      |

Table S3. Absorbance values obtained with phosphate buffer testing procedure

| Specimen                                                 | Absorbance |
|----------------------------------------------------------|------------|
| "Blank"                                                  | 0.0854     |
| "Neat recycled EVA polymer without any leather shavings" | 0.0081     |
| "Recycled EVA polymer with leather shavings (1:1)"       | 0.0084     |
| "Standard"                                               | 0.0788     |

Table S4. Absorbance values obtained with water testing procedure

| Specimens                                                | "Absorbance" |
|----------------------------------------------------------|--------------|
| "Blank"                                                  | 0.0204       |
| "Neat recycled EVA polymer without any leather shavings" | 0.0123       |
| "Recycled EVA polymer with leather shavings (1:1)"       | 0.0172       |
| "Standard"                                               | 0.0822       |

Table S5. Presence of functional group in neat recycled EVA without incorporating leather fiber reinforcements in FTIR analysis.

| S. No. | FREQUENCY RANGE<br>(cm <sup>-1</sup> ) | FUNCTIONAL GROUP                                                                                                      |
|--------|----------------------------------------|-----------------------------------------------------------------------------------------------------------------------|
| 1      | 3100-2914.88                           | C-H stretching vibrations                                                                                             |
| 2      | 2869.56-2917.77                        | "C-H asymmetric and symmetric stretching of the methylene group (-CH <sub>2</sub> -), respectively of EVA copolymers" |
| 3      | 1739                                   | Acetate                                                                                                               |
| 4      | 1701.87-1736.58                        | Vinyl-Acetate group due to Stretching vibrations of C=O                                                               |
| 5      | 1432.85-1466.6                         | "C=C and due to the methylene stretch"                                                                                |
| 6      | 1464                                   | CH <sub>2</sub> group deformation bands                                                                               |
| 7      | 1371.14                                | CH <sub>3</sub>                                                                                                       |
| 8      | 1296.89                                | C-O                                                                                                                   |
| 9      | 1130.08-1104.05                        | "Asymmetrical stretching vibration of the C-O band"                                                                   |
| 10     | 1123.33                                | C-O-C stretch mode                                                                                                    |
| 11     | 996.053                                | "Symmetric stretching vibration of the C-O-C"                                                                         |
| 12     | 810.92                                 | Inner vibration of methylene group                                                                                    |
| 13     | Less than 700                          | CH <sub>2</sub> (ethylene)                                                                                            |
| 14     | 530-620                                | C=O                                                                                                                   |

Table S6. Presence of functional group in Leather shavings/recycled EVA polymer composites in FTIR analysis.

| S. No. | FREQUENCY RANGE<br>(cm <sup>-1</sup> ) | FUNCTIONAL GROUP                        |
|--------|----------------------------------------|-----------------------------------------|
| 1      | 3200.15-3500.40                        | O-H in side chains and terminal groups  |
| 2      | 2914.88-2848.35                        | Absence of fatty substances             |
| 3      | 1641.13-1732.73                        | Amide (-NH)                             |
| 4      | 1433.82-1461.78                        | -COO- group                             |
| 5      | 1345.11-1378.85                        | -C-O- group                             |
| 6      | 1204.33-1296.89                        | Deformation vibration of -C=O group     |
| 7      | 1175                                   | C-N stretching (Leather Shaving fibers) |
| 8      | 967.126-1051.01                        | -C-O-C- ether group                     |
| 9      | 726.068-600                            | Cr-O Metallic ions (Cr)                 |
